# Supplementary material for: Antiviral activity of chitosan nanoparticles encapsulating silymarin (Sil–CNPs) against SARS-CoV-2 (in silico and in vitro study)
Source: PubMed Central journal article supplement — RSC Adv. 2022 May 25;12(25):15775–86. doi: 10.1039/d2ra00905f (PMC9132606; doi:10.1039/d2ra00905f), 2022-05-25
Supplement: RA-012-D2RA00905F-s001.pdf [file RA-012-D2RA00905F-s001.pdf]

# Antiviral activity of chitosan nanoparticles encapsulating silymarin (Sil-CNPs) against SARS- CoV-2 (*in silico* and *in vitro* study).

Samah A. Loutfy<sup>1,2\*</sup>, Ahmed I. Abdel-Salam<sup>2</sup>, Yassmin Moatasim<sup>3</sup>, Mokhtar R. Gomaa<sup>3</sup>, Nasra F. Abdel Fattah<sup>1</sup>, Merna H. Emam<sup>2</sup>, Fedaa Ali<sup>2</sup>, Hasnaa A. ElShehaby<sup>4</sup>, Eman A. Ragab<sup>4</sup>, Hanaa M. Alam El-Din<sup>1</sup>, Ahmed Mostafa<sup>3</sup>, Mohamed A. Ali<sup>3</sup>, Amal Kasry<sup>2\*</sup>.

<sup>1</sup>Virology and Immunology Unit, Cancer Biology Department, National Cancer Institute (NCI), Cairo University, Fom El-Khalig 11796, Cairo, Egypt.

<sup>2</sup>Nanotechnology Research Center (NTRC), the British University in Egypt, El-Shorouk City, Suez Desert Road, Cairo 11837 -P.O. Box 43, Egypt.

<sup>3</sup>Center of Scientific Excellence for Influenza Viruses, National Research Centre (NRC), Giza 12622, Egypt.

<sup>4</sup>Biochemistry Dept, Faculty of science, Cairo University.

**KEYWORDS:** SARS-CoV-2, Adenovirus, Polymeric drug delivery system, silymarin-chitosan nanoparticles, computer modeling, Real-time PCR.

**Table S1.** Residues interacting with ligands (Chitosan nanoparticles, Silymarin, and Remdesivir) in the predicted Hexon, ACE2, and Spike protein binding pockets, respectively.

| <b>Hexon</b>                                |                 |            |               |                 |               |               |                 |               |
|---------------------------------------------|-----------------|------------|---------------|-----------------|---------------|---------------|-----------------|---------------|
| Chitosan nanoparticles                      |                 |            | Silymarin     |                 |               | Remdesivir    |                 |               |
| <b>Hydrogen bonding</b>                     |                 |            |               |                 |               |               |                 |               |
| <b>Resid.</b>                               | <b>H-A</b>      | <b>D-A</b> | <b>Resid.</b> | <b>H-A</b>      | <b>D-A</b>    | <b>Resid.</b> | <b>H-A</b>      | <b>D-A</b>    |
| 117 SER                                     | 2.09            | 2.75       | 127 LYS       | 2.19            | 3.13          | 644 ASN       | 2.83            | 3.27          |
| 117 SER                                     | 2.17            | 2.75       | 463 ASN       | 2.00            | 2.87          | 645 ASP       | 2.16            | 3.08          |
| 117 SER                                     | 2.08            | 3.00       | 467 ASN       | 2.24            | 3.18          | 646 TYR       | 2.54            | 3.14          |
| 127 LYS                                     | 3.21            | 3.90       | 470 ARG       | 3.02            | 3.43          | 648 SER       | 3.48            | 3.96          |
| 234 TYR                                     | 3.21            | 3.92       | 837 ARG       | 2.77            | 3.28          | 676 ARG       | 2.54            | 3.41          |
| 467 ASN                                     | 2.68            | 3.53       |               |                 |               | 676 ARG       | 2.22            | 3.11          |
| 470 ARG                                     | 3.23            | 4.04       |               |                 |               |               |                 |               |
| 470 ARG                                     | 3.13            | 3.95       |               |                 |               |               |                 |               |
| 475 SER                                     | 2.30            | 3.06       |               |                 |               |               |                 |               |
| 476 ASN                                     | 2.42            | 3.40       |               |                 |               |               |                 |               |
| 539 ARG                                     | 2.93            | 3.28       |               |                 |               |               |                 |               |
| 539 ARG                                     | 2.49            | 3.28       |               |                 |               |               |                 |               |
| 828 PHE                                     | 2.04            | 3.01       |               |                 |               |               |                 |               |
| <b>Salt Bridges</b>                         |                 |            |               |                 |               |               |                 |               |
| <b>Resid.</b>                               | <b>Distance</b> |            |               |                 |               |               |                 |               |
| 127 LYS                                     | 3.77            |            |               |                 |               |               |                 |               |
| 470 ARG                                     | 3.45            |            |               |                 |               |               |                 |               |
| 538 HIS                                     | 5.18            |            |               |                 |               |               |                 |               |
| <b>Hydrophobic Interactions</b>             |                 |            |               |                 |               |               |                 |               |
|                                             |                 |            | <b>Resid.</b> | <b>Distance</b> |               | <b>Resid.</b> | <b>Distance</b> |               |
|                                             |                 |            | 462 ILE       | 3.74            |               | 372 LEU       | 3.50            |               |
|                                             |                 |            | 470 ARG       | 3.74            |               | 646 TYR       | 3.87            |               |
|                                             |                 |            | 471 ASN       | 3.52            |               | 646 TYR       | 3.47            |               |
|                                             |                 |            | 828 PHE       | 3.82            |               | 788 LYS       | 3.81            |               |
|                                             |                 |            |               |                 |               | 788 LYS       | 3.57            |               |
|                                             |                 |            |               |                 |               | 870 LEU       | 3.74            |               |
| <b><math>\pi</math>-Cation Interactions</b> |                 |            |               |                 |               |               |                 |               |
|                                             |                 |            | <b>Resid.</b> | <b>Distance</b> | <b>offset</b> | <b>Resid.</b> | <b>Distance</b> | <b>offset</b> |
|                                             |                 |            | 470 ARG       | 3.69            | 0.87          | 676 ARG       | 3.89            | 1.66          |

| ACE2                       |          |        |           |          |         |            |          |        |
|----------------------------|----------|--------|-----------|----------|---------|------------|----------|--------|
| Chitosan nanoparticles     |          |        | Silymarin |          |         | Remdesivir |          |        |
| Hydrogen bonding           |          |        |           |          |         |            |          |        |
| Resid.                     | H-A      | D-A    | Resid.    | H-A      | D-A     | Resid.     | H-A      | D-A    |
| 166 GLU                    | 2.32     | 3.02   | 479 GLU   | 3.10     | 3.42    | 482 ARG    | 2.46     | 2.92   |
| 174 LYS                    | 3.45     | 3.87   | 644 ARG   | 3.31     | 3.88    | 482 ARG    | 2.80     | 3.24   |
| 492 PRO                    | 2.54     | 3.17   | 668 GLU   | 2.08     | 2.86    | 489 GLU    | 2.36     | 3.20   |
| 493 HIS                    | 2.47     | 3.18   | 672 VAL   | 2.98     | 3.79    | 613 TYR    | 3.34     | 3.84   |
| 493 HIS                    | 2.48     | 3.01   | 675 LEU   | 2.19     | 3.18    | 674 ASN    | 2.54     | 3.21   |
| 494 ASP                    | 2.40     | 3.25   |           |          |         | 675 LEU    | 2.17     | 3.18   |
| 494 ASP                    | 3.20     | 4.04   |           |          |         |            |          |        |
| 671 ARG                    | 3.39     | 4.07   |           |          |         |            |          |        |
| 672 VAL                    | 2.01     | 2.87   |           |          |         |            |          |        |
| 672 VAL                    | 2.03     | 2.86   |           |          |         |            |          |        |
| 674 ASN                    | 3.28     | 3.90   |           |          |         |            |          |        |
| 674 ASN                    | 3.24     | 3.79   |           |          |         |            |          |        |
| 675 LEU                    | 2.07     | 3.03   |           |          |         |            |          |        |
| Salt Bridges               |          |        |           |          |         |            |          |        |
| Resid.                     | Distance |        |           |          |         |            |          |        |
| 174 LYS                    | 5.49     |        |           |          |         |            |          |        |
| 644 ARG                    | 4.99     |        |           |          |         |            |          |        |
| 644 ARG                    | 5.42     |        |           |          |         |            |          |        |
| 671 ARG                    | 4.22     |        |           |          |         |            |          |        |
| $\pi$ -Cation Interactions |          |        |           |          |         |            |          |        |
| Resid.                     | Distance | offset | Resid.    | Distance | offset  | Resid.     | Distance | offset |
|                            |          |        | 644 ARG   | 4.10     | 1.84    |            |          |        |
| Hydrophobic Interactions   |          |        |           |          |         |            |          |        |
|                            |          |        | Resid.    | Distance | Resid.  | Distance   |          |        |
|                            |          |        | 475 LYS   | 3.74     | 475 LYS | 3.84       |          |        |
|                            |          |        | 494 ASP   | 3.36     | 479 GLU | 3.85       |          |        |
|                            |          |        | 672 VAL   | 3.77     | 492 PRO | 3.76       |          |        |
|                            |          |        | 675 LEU   | 3.62     | 494 ASP | 3.50       |          |        |
|                            |          |        |           |          | 495 GLU | 3.68       |          |        |
|                            |          |        |           |          | 640 MET | 3.81       |          |        |
|                            |          |        |           |          | 672 VAL | 3.46       |          |        |
|                            |          |        |           |          | 672 VAL | 3.99       |          |        |
|                            |          |        |           |          | 675 LEU | 3.68       |          |        |

| Spike protein          |     |     |           |     |     |            |     |     |
|------------------------|-----|-----|-----------|-----|-----|------------|-----|-----|
| Chitosan nanoparticles |     |     | Silymarin |     |     | Remdesivir |     |     |
| Hydrogen bonding       |     |     |           |     |     |            |     |     |
| Resid.                 | H-A | D-A | Resid.    | H-A | D-A | Resid.     | H-A | D-A |

|                                 |                 |      |               |                 |      |               |                 |      |
|---------------------------------|-----------------|------|---------------|-----------------|------|---------------|-----------------|------|
| 355 ARG                         | 2.31            | 3.06 | 336 CYS       | 2.86            | 3.73 | 371 SER       | 2.22            | 2.87 |
| 428 ASP                         | 2.38            | 2.92 | 371 SER       | 1.87            | 2.71 | 371 SER       | 2.14            | 2.87 |
| 430 THR                         | 2.78            | 3.73 | 373 SER       | 3.60            | 3.94 | 373 SER       | 2.80            | 3.69 |
| 430 THR                         | 1.89            | 2.84 | 373 SER       | 2.91            | 3.51 | 436 TRP       | 2.99            | 3.78 |
| 430 THR                         | 1.98            | 2.96 | 436 TRP       | 2.23            | 3.03 | 509 ARG       | 2.18            | 2.97 |
| 463 PRO                         | 2.30            | 2.90 |               |                 |      |               |                 |      |
| 463 PRO                         | 3.26            | 3.85 |               |                 |      |               |                 |      |
| 466 ARG                         | 3.12            | 4.06 |               |                 |      |               |                 |      |
| 466 ARG                         | 3.25            | 3.99 |               |                 |      |               |                 |      |
| 514 SER                         | 2.72            | 3.11 |               |                 |      |               |                 |      |
| 515 PHE                         | 2.05            | 2.97 |               |                 |      |               |                 |      |
| 516 GLU                         | 1.97            | 2.87 |               |                 |      |               |                 |      |
| 517 LEU                         | 1.92            | 2.89 |               |                 |      |               |                 |      |
| 517 LEU                         | 1.89            | 2.74 |               |                 |      |               |                 |      |
| <b>Salt Bridges</b>             |                 |      |               |                 |      |               |                 |      |
| <b>Resid.</b>                   | <b>Distance</b> |      | <b>Resid.</b> | <b>Distance</b> |      | <b>Resid.</b> | <b>Distance</b> |      |
| 466 ARG                         | 3.78            |      |               |                 |      |               |                 |      |
| <b>Hydrophobic Interactions</b> |                 |      |               |                 |      |               |                 |      |
| <b>Resid.</b>                   | <b>Distance</b> |      | <b>Resid.</b> | <b>Distance</b> |      | <b>Resid.</b> | <b>Distance</b> |      |
|                                 |                 |      | 338 PHE       | 3.71            |      | 338 PHE       | 3.72            |      |
|                                 |                 |      | 342 PHE       | 3.96            |      | 342 PHE       | 3.58            |      |
|                                 |                 |      | 367 VAL       | 3.90            |      | 342 PHE       | 3.84            |      |
|                                 |                 |      | 368 LEU       | 3.75            |      | 368 LEU       | 3.69            |      |

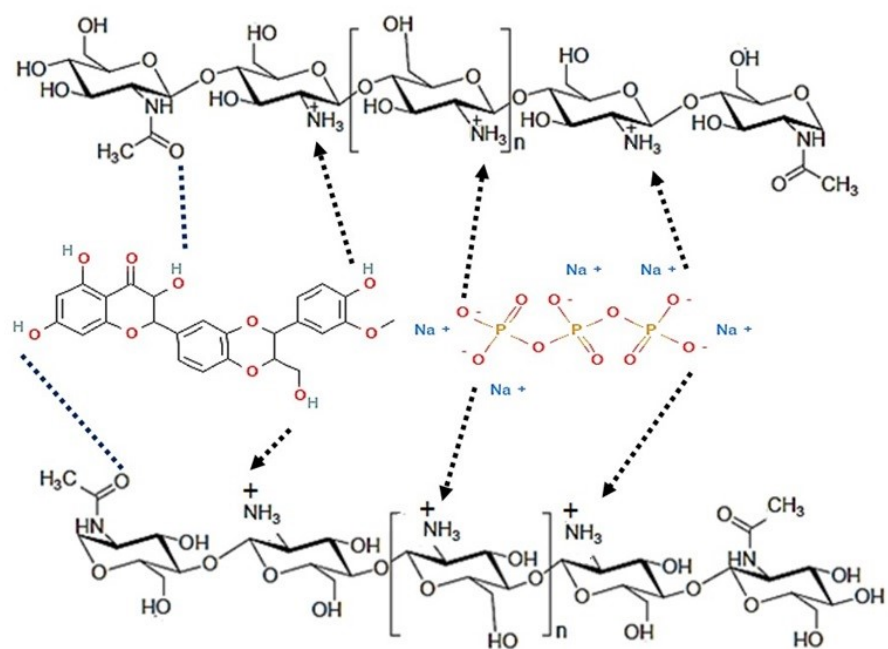

**Figure S1.** A schematic diagram of the chemical interaction of Sil @ CNPs nanocomposite.
